# Supplementary material
Source: publisher figshare collection journal article supplement (https://acs.figshare.com/ndownloader/files/10753795)
Supplement: Supplementary file 1 [file 10753795]

# **First Principle Molecular Dynamics Investigation of Waterborne As—V Species**

Sangkha Borah and P. Padma Kumar\*

*Department of Physics, Indian Institute of Technology Guwahati, Guwahati, Assam,  
India-781039*

E-mail: padmakumarp@iitg.ernet.in

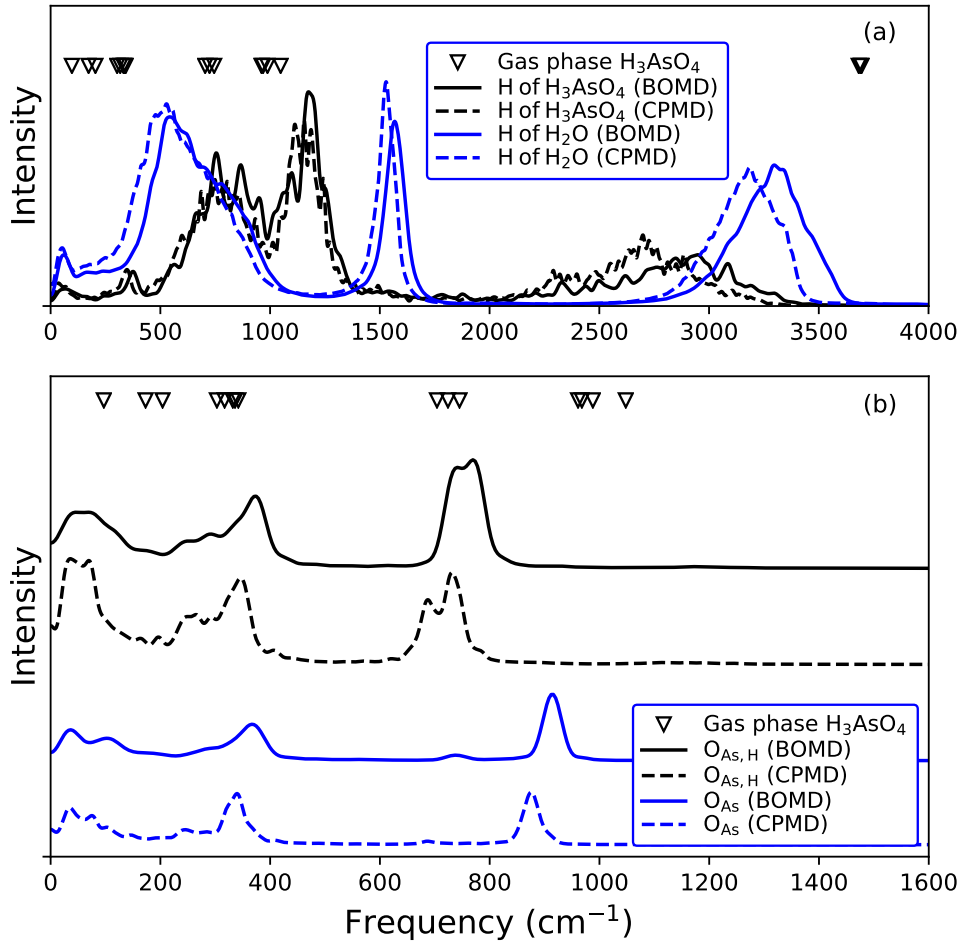

Figure S1: The vibrational density of states (VDOS) from CPMD (dotted lines) simulation is compared with Born-Oppenheimer (BO) MD (solid lines). Top panel (a): H of  $\text{H}_3\text{AsO}_4$  (black) and H of  $\text{H}_2\text{O}$  (blue); Bottom panel (b):  $\text{O}_{\text{As,H}}$  (black) and  $\text{O}_{\text{As}}$  (blue) atoms of  $\text{H}_3\text{AsO}_4$ . The gas phase vibrational frequencies are shown in both panels as triangles pointed-down.

The shifts of CPMD spectra w.r.t. the BOMD ones are approx.  $110 \text{ cm}^{-1}$  for OH stretching modes of  $\text{H}_2\text{O}$  and approx.  $240 \text{ cm}^{-1}$  for those of  $\text{H}_3\text{AsO}_4$  (intra-molecular), while for  $\text{As}-\text{O}_{\text{As}}$  and  $\text{As}-\text{O}_{\text{As,H}}$ , those are approx.  $40 \text{ cm}^{-1}$ . The BOMD simulations are carried out at 315 K starting from a well equilibrated structure of one  $\text{H}_3\text{AsO}_4$  solvated by 60  $\text{H}_2\text{O}$  molecules in box of size  $12.42 \text{ \AA}$ . These calculations are performed at the same level of theory as the CPMD simulations, except that a larger time steps of 0.25 fs is used, and the total run is 6 ps long.
